# Supplementary material for: Accumulation of Proline in Plants under Contaminated Soils—Are We on the Same Page?
Source: MDPI journal article supplement (doi:10.3390/antiox12030666), 2023-03-08
Supplement: s1 [file s1]

## Supplementary Material

**Table S1**

Effects of applying stress mitigators to plants facing salinity-induced stress, namely on the endogenous levels of proline.

| Stress factor |             | Plant species          | Stress-induced effects in comparison to the control                                                                                                                                                                | Mitigation treatment                          | Treatment-induced effects in comparison to the stress factor                                                                                                                                                                 | Reference |
|---------------|-------------|------------------------|--------------------------------------------------------------------------------------------------------------------------------------------------------------------------------------------------------------------|-----------------------------------------------|------------------------------------------------------------------------------------------------------------------------------------------------------------------------------------------------------------------------------|-----------|
| Salinity      | 200 mM NaCl | <i>Cucumis sativus</i> | ↓ Chl and Car, ↓ $g_s$ , ↑ H <sub>2</sub> O <sub>2</sub> , MDA, and EL, ↑ phenols, ↓ RWC, ↑ <b>proline</b> , ↑ SOD, CAT, GR, and APX, ↓ AsA, ↑ ABA, JA, and SA, ↑ Na and ↓ K, Ca, Mg, Fe, Zn, Mn, and Cu levels    | Inoculation with arbuscular mycorrhizal fungi | ↑ Chl and Car, ↑ $g_s$ , ↓ H <sub>2</sub> O <sub>2</sub> , MDA, and EL, ↑ phenols, ↑ RWC, ↑ <b>proline</b> , ↑ SOD, CAT, GR, and APX, ↑ AsA content, ↓ ABA and ↑ JA, and SA, ↓ Na and ↑ K, Ca, Mg, Fe, Zn, Mn, and Cu levels | [185]     |
|               | 150 mM NaCl | <i>Vicia faba</i>      | ↓ fresh and dry biomass<br>↓ yield, ↓ No. of nodules<br>↓ leaf area, ↓ soluble sugars and soluble proteins<br>↑ free amino acids<br>↑ <b>proline</b> , ↑ Na and ↓ K, Ca, and Mg<br>↑ MDA, ↑ SOD, CAT, POX, and APX | Auxin (1.5 mM Indole-3-acetic acid)           | ↑ fresh and dry biomass<br>↑ yield, ↑ No. of nodules<br>↑ leaf area, ↑ soluble sugars and soluble proteins<br>↑ Free amino acids                                                                                             | [186]     |
|               |             |                        |                                                                                                                                                                                                                    | CK (0.9 mM 6-Benzylaminopurine)               | ↓ <b>proline</b> , ↓ Na and ↑ K, Ca, and Mg<br>↓ MDA, ↑ SOD, CAT, POX, and APX                                                                                                                                               |           |
|               | 150 mM NaCl | <i>Brassica juncea</i> | ↓ length and fresh and dry biomass, ↓ leaf area<br>↓ Chl, ↓ photosynthetic rate, $g_s$ and WUE, ↑ SOD, CAT, and POX, ↑ <b>proline</b>                                                                              | Si                                            | ↑ length and fresh and dry biomass, ↑ leaf area<br>↑ Chl, ↑ photosynthetic rate, $g_s$ , and WUE, ↑ SOD, CAT, and POX, ↑ <b>proline (BRs and combination of Si and BRs)</b>                                                  | [187]     |
|               |             |                        |                                                                                                                                                                                                                    | BRs (1 × 10 <sup>-8</sup> mM epibrassinolide) |                                                                                                                                                                                                                              |           |
|               | 80 mM NaCl  | <i>Cicer arietum</i>   | ↓ dry biomass<br>↓ No. of flowers, pods, and nodules, ↓ Chl and Car, ↓ leghemoglobin and ↑ lignin, ↑ ROS and MDA content, ↑ SOD, CAT, and POX, ↓ protein, ↑ phenols and soluble sugar, ↑ <b>proline</b>            | Si and BRs                                    | <b>= proline (Si)</b>                                                                                                                                                                                                        | [188]     |
|               |             |                        |                                                                                                                                                                                                                    | SA (0.5 mM)                                   | ↑ dry biomass<br>↑ = No. of flowers and pods and ↑ No. of nodules, ↑ Chl and Car, ↑ leghemoglobin and ↑ lignin<br>↓ ROS and MDA content<br>↑ SOD, CAT, and POX, ↑ protein, phenols, and soluble sugars, ↑ <b>proline</b>     |           |
|               | 200 mM NaCl | <i>Zea mays</i>        | ↓ diameter, length and fresh and dry biomass, ↓ leaf area, ↓ Chl and Car, ↓ photosynthetic rate, $g_s$ , and $E$ , ↓ RWC, ↑ soluble sugars, ↑ EL, ROS and MDA, = SOD and POX, ↑ CAT and APX, ↑ <b>proline</b>      | Melatonin (30, 60 and 90 μM)                  | ↑ diameter, length and fresh and dry biomass (except = root fresh weight)<br>↑ leaf area, ↑ Chl and Car, ↑ photosynthetic rate, $g_s$ , and $E$<br>↑ RWC, ↓ soluble sugars,                                                  | [189]     |

|  |                |                          |                                                                                                                                        |                                                    |                                                                                                                                                                                                                               |       |
|--|----------------|--------------------------|----------------------------------------------------------------------------------------------------------------------------------------|----------------------------------------------------|-------------------------------------------------------------------------------------------------------------------------------------------------------------------------------------------------------------------------------|-------|
|  |                |                          |                                                                                                                                        |                                                    | ↓ EL and ROS and MDA, ↑ SOD, POX, CAT, and APX, ↓ <b>proline</b>                                                                                                                                                              |       |
|  | 50-200 mM NaCl | <i>Setaria italica</i>   | ↓ growth, ↑ H <sub>2</sub> O <sub>2</sub> content                                                                                      | Se (1 μM)                                          | ↑ growth, ↓ H <sub>2</sub> O <sub>2</sub> content                                                                                                                                                                             | [190] |
|  |                | <i>Panicum miliaceum</i> | ↑ soluble sugars, GB, protein and GSH, ↑ SOD, CAT, GR, GST, POX, and APX, ↑ <b>proline</b>                                             |                                                    | ↑ soluble sugars, GB, protein and GSH, ↑ SOD, CAT, GR, GST, POX, and APX, ↑ <b>proline</b>                                                                                                                                    |       |
|  | 50 mM NaCl     | <i>Cucumis sativus</i>   | ↓ growth, ↑ ROS, ↑ <b>proline</b> , ↑ P5CS and ↓ ProDH and OAT activity, ↑ ABA (↓ at 12 d), IAA (↓ at 12 d) and CK (↓ at 6 d) and ↓ SA | Si (0.3 mM Na <sub>2</sub> SiO <sub>3</sub> )      | ↑ growth, ↓ ROS, ↑ <b>proline</b> (↓ at 9 d), ↑ P5CS (↓ at 9 d) and OAT and ↓ ProDH (↑ at 6 d) ↓ ABA (↑ at 12 d), IAA (↑ at 9 d) and CK (↑ at 6 d) and ↑ SA, (remained constant in NaCl + Si, but decreased overtime in NaCl) | [50]  |
|  | 100 mM NaCl    | <i>Sorghum bicolor</i>   | ↓ RWC, leaf area, and dry biomass, ↓ SOD, CAT, and APX activity, ↑ <b>proline</b> , ↑ MDA ↑ Na, ↓ K                                    | Si (28.6 mM via foliar spray, irrigation, or both) | ↑ RWC (= in foliar spray) leaf area (= in foliar spray), and dry biomass, ↑ SOD, CAT, and APX activity, ↓ <b>proline</b> (= for foliar spray), ↓ MDA, ↓ Na and ↑ K                                                            | [191] |
|  |                | <i>Helianthus annuus</i> |                                                                                                                                        |                                                    | *= RWC (↑ in the combination) ↑ leaf area and dry biomass ↑ SOD, CAT, and APX activity ↑ <b>proline</b> , ↓ MDA, ↓ Na, ↑ K                                                                                                    |       |

↑, ↓, and = symbolize the reported increase, decrease or maintenance of a certain parameter, respectively.

ABA, abscisic acid; APX, ascorbate peroxidase; AsA, ascorbate; Asp, asparagine; BR, brassinosteroids; CA, carbonic anhydrase; Car, carotenoids; CAT, catalase; Chl, chlorophylls; *C<sub>i</sub>*, intercellular CO<sub>2</sub> concentration; CK, cytokinins; DHAR, dehydroascorbate reductase; DPPH, 2,2-diphenyl-1-picrylhydrazyl; *E*, transpiration rate; EL, electrolyte leakage; Fv/Fm, maximum quantum yield of PSII; GA<sub>3</sub>, gibberellic acid; GB, glycine betaine; GDH, glutamate dehydrogenase; Glu, glutamate; Gly I, glyoxalase I; Gly II, glyoxalase II; GOGAT, glutamate synthase; GPX, glutathione peroxidase; GR, glutathione reductase; *g<sub>s</sub>*, stomatal conductance; GS, glutamine synthetase; GSH, glutathione; GSSG, glutathione disulfide; GST, glutathione S-transferase; GST, glutathione S-transferases; H<sub>2</sub>O<sub>2</sub>, hydrogen peroxide; IAA: indole acetic acid; JA, jasmonic acid; LP, lipid peroxidation; MDA, malondialdehyde; MDHAR, monodehydroascorbate reductase; NADPH, nicotinamide adenine dinucleotide phosphate; NPQ, non-photochemical quenching; NR, nitrate reductase; O<sub>2</sub><sup>-</sup>, superoxide anion; OAT, ornithine aminotransferase; P5C, pyrroline-5-carboxylate; P5CS, pyrroline-5-carboxylate synthase; P<sub>N</sub>, net photosynthetic rate; POX, peroxidase; PPO, polyphenol oxidase; ProDH, proline dehydrogenase; PTS, trisodium-8-hydroxy-1,3,6-pyrenetrisulphonic acid; Put, putrescine; ROS, reactive oxygen species; RuBisCO, ribulose-1,5-bisphosphate carboxylase-oxygenase; RWC, relative water content; SA, salicylic acid; SAMDC, S-adenosylmethionine decarboxylase; SOD, superoxide dismutase; Spd, spermidine; Spm, spermine; TAC, total antioxidant capacity; WUE, water use efficiency; Φ PSII, quantum yield of PSII.

**Table S2**

Physiological effects observed in plants under abiotic stress caused by exposure to contaminant levels of salt, heavy metals, and xenobiotics and in response to the exogenous application of proline.

| Stress factor |                                    | Plant species                       | Stress-induced effects in comparison to the control                                                                                                                                                                                                                                   | Proline treatment | Pro-induced effects in comparison to stress                                                                                                                                                                                          | Citation |
|---------------|------------------------------------|-------------------------------------|---------------------------------------------------------------------------------------------------------------------------------------------------------------------------------------------------------------------------------------------------------------------------------------|-------------------|--------------------------------------------------------------------------------------------------------------------------------------------------------------------------------------------------------------------------------------|----------|
| Salinity      | 100 - 200 mM                       | <i>Hordeum vulgare</i> L.           | ↓ growth, ↑ <b>proline</b> , ↑ LP, ↑ SOD, CAT, APX, GR and POX, = DHAR                                                                                                                                                                                                                | 5 mM              | = growth, ↑ <b>proline</b> , ↓ LP, ↓ SOD, ↑ CAT, GR and POX, = APX and DHAR                                                                                                                                                          | [88]     |
|               | 100 mM                             | <i>Cucumis sativus</i> L.           | ↓ growth, = <b>proline</b> , ↓ leaf RWC, ↑ Na <sup>+</sup> /K <sup>+</sup> , ↑ Cl <sup>-</sup> , ↑ MDA, ↑ SOD, CAT APX, =POD                                                                                                                                                          | 10 mM             | ↑ growth, ↑ <b>proline</b> , ↑ leaf RWC, ↓ Na <sup>+</sup> /K <sup>+</sup> , = Cl <sup>-</sup> , ↓ MDA, ↓ SOD, ↑ POX, =CAT and APX                                                                                                   | [81]     |
|               | 25 mM                              | <i>Oriza sativa</i> L.              | ↑ PTS uptake, ↑ Na <sup>+</sup> , = K <sup>+</sup> , = <b>proline</b> and betaine                                                                                                                                                                                                     | 1 and 5 mM        | ↓ PTS uptake, ↓ Na <sup>+</sup> , ↑ K <sup>+</sup> , ↑ <b>proline</b> and = betaine                                                                                                                                                  | [192]    |
|               | 30 mM                              | <i>Vigna radiata</i> L.             | ↓ GSH and GSSG, ↑ GPX, GR, GST and Gly, ↑ H <sub>2</sub> O <sub>2</sub> , ↑ MDA                                                                                                                                                                                                       | 15 mM             | ↑ GSH, ↓ GSSG, = GPX, GST and Gly, ↓ GR, ↓ H <sub>2</sub> O <sub>2</sub> , ↓ MDA                                                                                                                                                     | [89]     |
|               | 200 and 100 mM                     | <i>Olea europaea</i> L. cv. Chemlal | ↓ growth, ↓ leaf water relations, ↓ photosynthetic activity, ↓ photosynthetic pigments, ↑ <b>proline</b> , ↑ sugars, ↑ SOD, CAT, APX and PPO                                                                                                                                          | 25 and 50 mM      | ↑ growth, ↑ leaf water relations, ↑ photosynthetic activity, ↑ photosynthetic pigments, ↑ <b>proline</b> , ↓ sugars, = SOD, ↑ CAT and APX, ↓ PPO                                                                                     | [91]     |
|               | 100 mM                             | <i>Sorghum bicolor</i> L.           | ↓ germination rate, ↓ growth, ↓ Chl                                                                                                                                                                                                                                                   | 0,5 and 100 mM    | ↑ germination rate, ↑ growth, ↑ Chl                                                                                                                                                                                                  | [193]    |
|               | 200 mM                             | <i>Vigna radiata</i> L.             | ↓ AsA, ↑ GSH and GSSG, ↑ H <sub>2</sub> O <sub>2</sub> , ↑ LP, ↓ MDHAR, DHAR, CAT and Gly I, ↑ GST, GPX and Gly II, = APX and GR                                                                                                                                                      | 5 mM              | ↑ AsA, ↑GSH and GSSG, ↓ H <sub>2</sub> O <sub>2</sub> , ↓ LP, = MDHAR e GST, ↑ DHAR, CAT, Gly I, GPX and Gly II, APX and GR                                                                                                          | [89]     |
|               | 0 - 400 mM                         | <i>Oriza sativa</i> L.              | ↓ germination rate, ↓ growth, ↓ photosynthetic rate and Chl, ↑ <b>proline</b> , ↓ proteins                                                                                                                                                                                            | 1 mM              | ↑ germination rate, ↑ growth, ↑ photosynthetic rate and Chl, = <b>proline</b> , ↑ proteins                                                                                                                                           | [194]    |
|               | EC = 1.5 – 13.5 dS m <sup>-1</sup> | <i>Brassica napus</i> L.            | ↓ growth, ↓ germination rate, ↓ photosynthetic pigments, ↑ <b>proline</b> , ↑ sugars, ↑ AsA, ↑ Na <sup>+</sup> and Cl <sup>-</sup> , ↓ N, P and K <sup>+</sup>                                                                                                                        | 10 mM             | ↑ growth, ↑ germination rate, ↑ photosynthetic pigments, ↑ <b>proline</b> , ↑ sugars, = AsA, ↑ Na <sup>+</sup> , Cl <sup>-</sup> and K <sup>+</sup> , ↑ N, P                                                                         | [195]    |
|               | 100 mM                             | <i>Oriza sativa</i> L.              | ↓ growth, ↓ Chl, ↑ PTS uptake, ↑ Na <sup>+</sup> /K <sup>+</sup>                                                                                                                                                                                                                      | 1 mM              | ↑ growth, ↑ Chl, ↓ PTS uptake, ↓ Na <sup>+</sup> /K <sup>+</sup>                                                                                                                                                                     | [196]    |
|               | 100 mM                             | <i>Oriza sativa</i> L.              | ↓ growth, ↑ Na <sup>+</sup> /K <sup>+</sup> , ↑ <b>proline</b> , ↑ H <sub>2</sub> O <sub>2</sub> , ↑ soluble sugars, ↑ H <sub>2</sub> O <sub>2</sub> , ↑ SOD, POX, APX and CAT, ↑ P5CS and P5CR expression ↑ <i>Cu/Zn SOD</i> , <i>Mn SOD</i> , <i>cAPX</i> and <i>CAT</i> expression | 10 mM             | = growth, ↓ Na <sup>+</sup> /K <sup>+</sup> , ↑ <b>proline</b> , ↑ H <sub>2</sub> O <sub>2</sub> , ↓ SOD, POX and CAT, = APX, ↑ P5CS and P5CR expression, = <i>Cu/Zn SOD</i> , <i>Mn SOD</i> , <i>cAPX</i> and <i>CAT</i> expression | [197]    |

|                                     |                                  |                                                                                                                                                                                                                                                                                                                                                                      |           |                                                                                                                                                                                                                                                                                                                                                                    |           |
|-------------------------------------|----------------------------------|----------------------------------------------------------------------------------------------------------------------------------------------------------------------------------------------------------------------------------------------------------------------------------------------------------------------------------------------------------------------|-----------|--------------------------------------------------------------------------------------------------------------------------------------------------------------------------------------------------------------------------------------------------------------------------------------------------------------------------------------------------------------------|-----------|
| 200 mM                              | <i>Oriza sativa</i> L.           | ↓ growth, ↑ Na <sup>+</sup> /K <sup>+</sup> , ↑ SOD, POX, APX and CAT, ↑ H <sub>2</sub> O <sub>2</sub>                                                                                                                                                                                                                                                               | 10 mM     | ↓ growth, ↓ Na <sup>+</sup> /K <sup>+</sup> , ↓ SOD, POX, ↑ APX and CAT, ↓ H <sub>2</sub> O <sub>2</sub>                                                                                                                                                                                                                                                           | [198,201] |
| EC = 1.84 – 8.97 dS m <sup>-1</sup> | <i>Phaseolus vulgaris</i> L.     | ↓ growth, ↓ photosynthetic pigments, ↑ <b>proline</b> , ↑ AsA, ↑ NO <sub>3</sub> <sup>-</sup> and NO <sub>2</sub> <sup>-</sup> , ↓ P and K <sup>+</sup> , ↑ Na <sup>+</sup> , ↑ Na <sup>+</sup> /K <sup>+</sup> , ↑ SOD, CAT and POD                                                                                                                                 | 5 mM      | ↑ growth, ↑ photosynthetic pigments, ↑ <b>proline</b> , ↑ AsA, ↓ NO <sub>3</sub> <sup>-</sup> and NO <sub>2</sub> <sup>-</sup> , ↑ P and K <sup>+</sup> , ↓ Na <sup>+</sup> , ↓ Na <sup>+</sup> /K <sup>+</sup> , ↑ SOD, CAT and POD                                                                                                                               | [71]      |
| 100 – 200 mM                        | <i>Hordeum vulgare</i> L.        | ↓ growth, ↓ photosynthetic pigments, ↑ <b>proline</b> , ↓ RWC, ↓ sugars, ↑ EL, ↑ SOD, POX and CAT                                                                                                                                                                                                                                                                    | 1 mM      | ↑ growth, ↑ photosynthetic pigments, ↑ <b>proline</b> , ↑ RWC, ↑ sugars, ↑ EL, =SOD, ↑ POX and CAT                                                                                                                                                                                                                                                                 | [90]      |
| 100 mM                              | <i>Oryza sativa</i> L.           | ↓ germination rate, ↓ relative germination energy, ↓ α and β - amylase activity                                                                                                                                                                                                                                                                                      | 4 - 45 mM | ↑ germination rate, ↑ relative germination energy, ↑ α and β - amylase activity                                                                                                                                                                                                                                                                                    | [199]     |
| 100 mM                              | <i>Pisum sativum</i> L.          | ↓ growth ↓ Chl, ↓ C <sub>i</sub> and g <sub>s</sub> , ↓ RWC, ↓ photosynthetic activity, ↑ O <sub>2</sub> <sup>-</sup> and H <sub>2</sub> O <sub>2</sub> , ↑ LP, ↓ membrane stability, ↑ EL, ↑ arginine decarboxylase and ornithine decarboxylase, ↑ S-adenosylmethionine, ↑ polyamines, ↑ <b>proline</b> and GB, ↑ total amino acids, sugars phenols and tocopherols | 60 mM     | ↑ growth, ↑ Chl ↑ C <sub>i</sub> , = g <sub>s</sub> , ↑ RWC, = photosynthetic activity, ↓ O <sub>2</sub> <sup>-</sup> and H <sub>2</sub> O <sub>2</sub> , ↓ LP, ↑ membrane stability, ↓ EL, ↑ arginine decarboxylase and ornithine decarboxylase, ↑ S-adenosylmethionine, ↑ polyamines, ↑ <b>proline</b> = GB, ↑ total amino acids, sugars phenols and tocopherols | [83]      |
| 150 and 300 mM                      | <i>Oryza sativa</i> L.           | ↓ RWC, ↓ Chl, ↑ LP, ↑ <b>proline</b> , ↑ linoleate 13s-, LOX, ↑ H <sub>2</sub> O <sub>2</sub> , ↓ AsA and GSH, ↑ GSSG, ↓ SOD, MDHAR, DHAR, CAT, GR and GPX, ↑ APX and GST                                                                                                                                                                                            | 5 mM      | ↑ RWC, ↑ Chl, ↓ LP, ↑ <b>proline</b> , ↓ LOX, ↓ H <sub>2</sub> O <sub>2</sub> , ↑ AsA and GSH, ↓ GSSG, ↑ SOD, MDHAR, DHAR, CAT, GR, GPX, APX and GST                                                                                                                                                                                                               | [84]      |
| 100 mM                              | <i>Saccharum officinarum</i> L.  | ↓ membrane integrity, = <b>proline</b> , ↓ proteins, ↑ Na <sup>+</sup> , ↓ K <sup>+</sup> , ↑ Na <sup>+</sup> /K <sup>+</sup> , ↑ POX, CAT and APX                                                                                                                                                                                                                   | 20 mM     | = membrane integrity, ↑ <b>proline</b> , = proteins, ↓ Na <sup>+</sup> , = K <sup>+</sup> and Na <sup>+</sup> /K <sup>+</sup> , ↑ POX, CAT, = APX                                                                                                                                                                                                                  | [78]      |
| 15 mM                               | <i>Glycine max</i> L. Merrill    | ↓ No. of pods and branches, ↓ seed weight and yield, ↓ seed protein and oil                                                                                                                                                                                                                                                                                          | 25 mM     | ↑ No. of pods and branches, ↑ seed weight and yield, ↑ seed protein and oil                                                                                                                                                                                                                                                                                        | [200]     |
| 150 mM                              | <i>Oryza sativa</i> L.           | ↓ growth, ↓ Chl, = LP, ↑ <b>proline</b>                                                                                                                                                                                                                                                                                                                              | 5 – 15 mM | ↑ growth, ↑ Chl, = LP, ↑ <b>proline</b>                                                                                                                                                                                                                                                                                                                            | [201]     |
| 200 mM                              | <i>Eurya emarginata</i> (Thunb.) | ↓ growth, ↓ RWC, ↑ LP, ↑ <b>proline</b> , ↑ Na <sup>+</sup> /K <sup>+</sup> , ↓ H <sup>+</sup> -ATPase, CAT, POX, GPX and PDH, ↑ SOD and P5CS                                                                                                                                                                                                                        | 10 mM     | ↑ growth, ↑ RWC, ↓ LP, ↑ <b>proline</b> , = Na <sup>+</sup> /K <sup>+</sup> , ↑ H <sup>+</sup> -ATPase, SOD, CAT POX, ↓ P5CS, = PDH and GPX                                                                                                                                                                                                                        | [87]      |

|  |                                      |                                        |                                                                                                                                                                                                                                                                                                    |                  |                                                                                                                                                                                                                                                                          |       |
|--|--------------------------------------|----------------------------------------|----------------------------------------------------------------------------------------------------------------------------------------------------------------------------------------------------------------------------------------------------------------------------------------------------|------------------|--------------------------------------------------------------------------------------------------------------------------------------------------------------------------------------------------------------------------------------------------------------------------|-------|
|  | 25 mM                                | <i>Zea mays</i> L.                     | ↓ growth, ↑ Na <sup>+</sup> /K <sup>+</sup> ,<br>↓ Chl, ↑ straw N,<br>= straw P and S, ↓<br>grain N, P and S                                                                                                                                                                                       | 25 - 100 mM      | ↑ growth, ↓ Na <sup>+</sup> /K <sup>+</sup> ,<br>= Chl, ↑ straw N, P<br>and S, ↑ grain N, P<br>and S                                                                                                                                                                     | [92]  |
|  | 25 – 100<br>mM                       | <i>Oryza<br/>sativa</i> L.             | ↓ growth, ↓ Chl,<br>↑ <b>proline</b> , ↓ AsA, ↓<br>POX and APX, = CAT,<br>↑ Na <sup>+</sup> /K <sup>+</sup>                                                                                                                                                                                        | 25 and 50<br>mM  | ↑ growth, ↑ Chl, ↑<br><b>proline</b> , ↑ AsA, ↑ POX<br>and APX, = CAT, ↓<br>Na <sup>+</sup> /K <sup>+</sup>                                                                                                                                                              | [72]  |
|  | 200 and<br>400 mM                    | <i>Cakile<br/>maritima</i> L.          | ↓ relative growth rate,<br>↓ <i>g<sub>s</sub></i> , and<br>photosynthetic rate<br>and <i>E</i> , ↓ Fv/Fm,<br>↓ ΦPSII, ↑ NPQ, ↓ ETR,<br>↑ LP, ↓ RWC, ↓<br>osmotic potential<br>(OP), ↑ Na <sup>+</sup> and Cl <sup>-</sup> , =<br>K <sup>+</sup> ,<br>↑ <b>proline</b> and soluble<br>carbohydrates | 20 mM            | ↑ relative growth rate,<br>↑ <i>g<sub>s</sub></i> , and<br>photosynthetic rate<br>and <i>E</i> , = Fv/Fm,<br>↑ ΦPSII, ↓ NPQ, ↑ ETR,<br>↓ LP, ↑ RWC, ↓ OP, ↑<br>Na <sup>+</sup> and Cl <sup>-</sup> , ↑ K <sup>+</sup> , ↑<br><b>proline</b> and soluble<br>carbohydrates | [80]  |
|  | EC = 2.8 –<br>5.6 dS m <sup>-1</sup> | <i>Brassica<br/>juncea</i> L.          | ↓ growth, ↓ leaf water<br>potential, ↑ EL, ↓<br>carbonic anhydrase, ↓<br>photosynthetic rate<br>and relative<br>attributes, ↑ Fv/Fm, ↑<br>CAT, POX and SOD, ↑<br><b>proline</b> , ↓ yield                                                                                                          | 20 mM            | ↑ growth, ↑ leaf water<br>potential, ↓ EL, ↑<br>carbonic anhydrase, ↑<br>photosynthetic rate<br>and relative attributes,<br>↑ Fv/Fm, ↑ CAT, POX<br>and SOD, ↓ <b>proline</b> , ↑<br>yield                                                                                | [85]  |
|  | 100 mM                               | <i>Zea mays</i> L.                     | ↓ growth, ↑ <b>proline</b> , ↓<br>RWP, ↓ membrane<br>stability, ↑ EL, ↑ SOD<br>and GPOX, ↓ protein,<br>↑ IAA and ABA, ↓ GA<br>and zeatin                                                                                                                                                           | 0.5 mM           | ↑ growth, ↑ <b>proline</b> , ↑<br>RWP, ↑ MSI, ↓ EL, ↑<br>SOD and GP, ↑<br>protein, ↑ IAA, GA and<br>zeatin, ↓ ABA                                                                                                                                                        | [202] |
|  | 60 and 120<br>mM                     | <i>Triticum<br/>aestivum</i> L.        | ↓ growth, ↓ Chl, ↑<br>sugars and phenols, ↑<br><b>proline</b> and GB, ↑<br>Na <sup>+</sup> , ↓ K <sup>+</sup> , ↑ Na <sup>+</sup> /K <sup>+</sup>                                                                                                                                                  | 50 and 100<br>mM | ↑ growth, ↑ Chl, ↑<br>sugars and phenols, ↑<br><b>proline</b> and GB, ↓<br>Na <sup>+</sup> , ↑ K <sup>+</sup> , ↓ Na <sup>+</sup> /K <sup>+</sup>                                                                                                                        | [77]  |
|  | 25 mM                                | <i>Oryza<br/>sativa</i> L.             | ↑ H <sub>2</sub> O <sub>2</sub> , ↑ LP, ↓ <i>E</i>                                                                                                                                                                                                                                                 | 1 mM             | ↓ H <sub>2</sub> O <sub>2</sub> , ↓ LP, ↑ <i>E</i>                                                                                                                                                                                                                       | [203] |
|  | 15 mM                                | <i>Glycine<br/>max</i> (L.)<br>Merrill | ↓ nodule number and<br>activity, ↓ N fixation                                                                                                                                                                                                                                                      | 25 mM            | ↑ nodule number and<br>activity, ↑ N fixation                                                                                                                                                                                                                            | [93]  |
|  | 25 – 100<br>mM                       | <i>Oryza<br/>sativa</i> L.             | ↓ growth, ↓ Chl, ↑<br><b>proline</b> , ↓ AsA, ↓ POX<br>and APX, = CAT, ↑<br>Na <sup>+</sup> /K <sup>+</sup>                                                                                                                                                                                        | 25 and 50<br>mM  | ↑ growth, ↑ Chl, ↑<br><b>proline</b> , ↑ AsA, ↑ POX<br>and APX, = CAT, ↓<br>Na <sup>+</sup> /K <sup>+</sup>                                                                                                                                                              | [72]  |
|  | 25 and 100                           | <i>Onobrychis<br/>viciifolia</i> L.    | ↓ growth, ↓ RWC, ↑ LP,<br>↑ relative membrane<br>permeability, ↑<br><b>proline</b> ,<br>↑ Na <sup>+</sup> /K <sup>+</sup>                                                                                                                                                                          | 2.5 mM           | ↑ growth, ↑ RWC, ↓ LP,<br>↓ relative membrane<br>permeability, ↑<br><b>proline</b> , ↓ Na <sup>+</sup> /K <sup>+</sup>                                                                                                                                                   | [79]  |
|  | 80 mM                                | <i>Zea mays</i> L.                     | ↓ growth, ↓ protein, =<br>N compounds, ↑ Na <sup>+</sup><br>and Cl <sup>-</sup> , ↓ K <sup>+</sup> , ↑ Na <sup>+</sup> /K <sup>+</sup>                                                                                                                                                             | 30 mM            | ↑ growth, ↑ protein, =<br>N compounds, ↓ Na <sup>+</sup><br>and Cl <sup>-</sup> , ↑ K <sup>+</sup> , = Na <sup>+</sup> /K <sup>+</sup>                                                                                                                                   | [74]  |
|  | 50 – 200<br>mM                       | <i>Oryza<br/>sativa</i> L.             | ↓ germination rate, ↓<br>seed vigor index, ↓ α-<br>amylase activity                                                                                                                                                                                                                                | 1 - 10 mM        | ↑ germination rate, ↑<br>seed vigor index, ↑ α-<br>amylase activity                                                                                                                                                                                                      | [204] |
|  | 150 mM                               | <i>Triticum<br/>aestivum</i> L.        | ↓ growth, ↓ Chl, ↑<br>SOD, = CAT and POD                                                                                                                                                                                                                                                           | 4 and 8 mM       | ↑ growth, ↑ Chl, ↑ SOD<br>and CAT, = POD                                                                                                                                                                                                                                 | [205] |

|              |                        |                               |                                                                                                                                                                                                                                  |          |                                                                                                                                                                                                                                 |       |
|--------------|------------------------|-------------------------------|----------------------------------------------------------------------------------------------------------------------------------------------------------------------------------------------------------------------------------|----------|---------------------------------------------------------------------------------------------------------------------------------------------------------------------------------------------------------------------------------|-------|
|              | 70 mM                  | <i>Sorghum bicolor</i> L.     | ↓ growth, ↑ membrane damage, ↓ RWC, ↓ photosynthetic rate and $g_s$ , ↓ $E$ and $C_i$ , ↑ $Na^+$ and $Cl^-$ , ↓ $K^+$ and $Ca^{2+}$ , ↑ $Na^+/K^+$ , ↓ sugars, = N compounds, ↓ Glu, GSH and Asp, ↑ aspartate and <b>proline</b> | 30 mM    | ↑ growth, = membrane damage, = RWC, = photosynthetic rate and $g_s$ , = $E$ and $C_i$ , ↓ $Na^+$ and $Cl^-$ , ↑ $K^+$ and $Ca^{2+}$ , ↓ $Na^+/K^+$ , = sugars and = N compounds, ↑ Glu, GSH, Asp, aspartate, and <b>proline</b> | [73]  |
| Heavy metals | Cd 5-100 $\mu$ M       | <i>Solanum nigrum</i> L.      | ↓ growth, ↑ SOD and CAT, ↑ ROS, = GSH, ↑ membrane damage                                                                                                                                                                         | 1 mM     | ↑ growth, ↑ Cd uptake, ↑ SOD and CAT, ↓ ROS, ↑ GSH, ↓ membrane damage                                                                                                                                                           | [137] |
|              | Cd 100 $\mu$ M         | <i>Nicotiana tabacum</i> L.   | ↓ growth, ↑ <b>proline</b> , ↑ LP, ↓ CAT, ↓ SOD, ↑ POX                                                                                                                                                                           | 1-10 mM  | ↑ growth, ↓ Cd uptake, ↓ LP, ↑ CAT, ↑ SOD, ↓ POX                                                                                                                                                                                | [206] |
|              | Cd 1 mM                | <i>Vigna radiata</i> L.       | ↓ AsA, ↑ GSH, ↑ GSSG, ↑ APX, ↓ DHAR, ↓ MDHAR, ↓ GR, ↑ GPX, ↑ GST, ↓ CAT, ↑ Glyoxalase I, ↓ Glyoxalase II, ↑ LP, ↑ $H_2O_2$                                                                                                       | 5 mM     | ↑ AsA, ↑ GSH, ↓ GSSG, ↑ APX, ↑ DHAR, ↑ MDHAR, ↑ GR, ↑ GPX, ↑ GST, ↑ CAT, ↑ Glyoxalase I, ↑ Glyoxalase II, ↓ LP, ↓ $H_2O_2$                                                                                                      | [89]  |
|              | Cd 1 mM                | <i>Triticum aestivum</i> L.   | ↓ growth, ↓ photosynthetic pigments, ↑ <b>proline</b> , ↑ AsA, ↓ SOD, ↑ POX, ↑ LP, ↑ membrane permeability, ↑ Cu uptake, ↓ Zn uptake                                                                                             | 1-10 mM  | ↑ growth, ↑ photosynthetic pigments, ↑ AsA, ↑ SOD, ↓ POX, ↓ LP, ↓ membrane permeability, ↓ $Cd^{2+}$ uptake, ↓ $Cu^{2+}$ uptake, ↑ $Zn^{2+}$ uptake                                                                             | [207] |
|              | Cd 25-100 mg $kg^{-1}$ | <i>Cicer arietinum</i> L.     | -                                                                                                                                                                                                                                | 20 mM    | ↑ growth, ↑ CA, ↑ $gS$ , ↑ $C_i$ , ↑ $E$ , ↑ WUE, ↑ $P_N$ , ↑ leaf water potential, ↑ POX, SOD, and CAT, ↑ seed proteins, ↑ seed yield                                                                                          | [119] |
|              | Cd 200 $\mu$ M         | <i>Triticum aestivum</i> L.   | ↓ growth, ↓ Chl, ↓ leaf phenolics, ↑ LP, ↑ $H_2O_2$                                                                                                                                                                              | 20 mM    | ↑ growth, ↑ Chl b, ↑ leaf phenolics, ↓ LP, ↓ $H_2O_2$                                                                                                                                                                           | [208] |
|              | Cd 10-30 mg $kg^{-1}$  | <i>Phoenix dactylifera</i> L. | ↓ growth, ↓ macronutrients uptake, ↓ membrane stability, ↓ POX, ↑ APX, ↑ $H_2O_2$ , ↓ starch, ↑ soluble sugars, ↑ total polyphenols, = Car                                                                                       | 20 mM    | ↑ growth, ↑ macronutrient contents, ↓ $Cd^{2+}$ uptake, ↑ membrane stability, ↑ POX, ↑ APX, ↓ $H_2O_2$ , ↑ soluble sugars, ↑ total polyphenols, ↑ Car                                                                           | [131] |
|              | Cd 10-30 mg $kg^{-1}$  | <i>Olea europaea</i> L.       | ↓ growth, ↓ Chl, ↓ $Ca^{2+}$ uptake, ↓ olive oil content, ↓ $P_N$ , ↓ $gS$ , ↓ $E$ , ↑ $H_2O_2$ , ↑ LP, ↑ EL, ↑ <b>proline</b> , ↑ SOD, CAT, GPX, and APX                                                                        | 10-20 mM | ↑ growth, ↑ Chl, ↓ $Cd^{2+}$ uptake, ↑ $K^+$ and $Mg^{2+}$ uptake, ↑ olive oil content, ↑ $P_N$ , ↑ $gS$ , = $E$ , ↓ $H_2O_2$ , ↓ LP, ↓ EL, ↑ SOD, CAT, GPX, and APX                                                            | [209] |

|  |                                     |                                  |                                                                                                                                                                                                                                                                                                                                            |                          |                                                                                                                                                                                                                                                                                                                      |       |
|--|-------------------------------------|----------------------------------|--------------------------------------------------------------------------------------------------------------------------------------------------------------------------------------------------------------------------------------------------------------------------------------------------------------------------------------------|--------------------------|----------------------------------------------------------------------------------------------------------------------------------------------------------------------------------------------------------------------------------------------------------------------------------------------------------------------|-------|
|  | Cd<br>25-100 mg<br>kg <sup>-1</sup> | <i>Cicer<br/>arietinum</i> L.    | -                                                                                                                                                                                                                                                                                                                                          | 20 mM                    | ↑ nodule growth, ↑<br>nodule<br>leghemoglobin, ↑<br>nodule nitrogenase<br>activity, ↑ nodule<br>nitrogen, nodule<br>carbohydrates, ↑<br>nodule GS, ↑ GOGAT<br>and GDH, ↑ root<br>nitrate, ↑ leaf<br>nitrogen, ↑ leaf NR                                                                                              | [210] |
|  | Cd<br>50 mg L <sup>-1</sup>         | <i>Triticum<br/>aestivum</i> L.  | ↑ growth, ↓ leaf water<br>content, ↑ <b>proline</b> , ↑<br>LP, ↓ SOD                                                                                                                                                                                                                                                                       | 5-20 mM                  | ↑ growth (only at 20<br>mM <b>proline</b> for 72h),<br>↑ leaf water content, ↓<br>LP, = SOD                                                                                                                                                                                                                          | [211] |
|  | Cd<br>1.5 mM                        | <i>Phaseolus<br/>vulgaris</i> L. | ↓ growth, ↓ yield,<br>↓ Chl, ↓ Car,<br>↑ <b>proline</b> , ↑ soluble<br>sugars, ↑ GSH, ↓ RWC,<br>↓ membrane stability,<br>↑ LP, ↑ EL, ↓ P <sub>N</sub> , ↓ E, ↑<br>CAT, POX, APX, SOD,<br>and GR, ↓ N, P, and K <sup>+</sup><br>uptake, ↓ K <sup>+</sup> / Na <sup>+</sup>                                                                  | 6 mM                     | ↑ growth, ↑ yield,<br>↑ Chl, ↑ Car,<br>↑ RWC, ↑ membrane<br>stability, ↓ LP,<br>↓ EL,<br>↑ P <sub>N</sub> , ↑ E, ↓ Cd <sup>2+</sup><br>uptake, ↑ CAT, APX,<br>and SOD, = POX and<br>GR, ↑ N and P uptake,<br>↑ K <sup>+</sup> / Na <sup>+</sup>                                                                      | [149] |
|  | Cd<br>80 μM                         | <i>Brassica<br/>juncea</i> L.    | ↓ growth, ↓ Chl, ↓ Car,<br>↑ <b>proline</b> , ↓ P <sub>N</sub> , ↓ gS, ↑<br>Ci, ↓ E, ↓ cell viability,<br>↑ H <sub>2</sub> O <sub>2</sub> , ↑ O <sub>2</sub> <sup>-</sup> , ↑ LP, ↑<br>CAT, ↑ leaf POX, =<br>APX and SOD, ↓<br>GSH/GSSG                                                                                                    | 20-60 mg L <sup>-1</sup> | ↓ growth, ↑ Chl, ↑ Car,<br>↑ P <sub>N</sub> , ↑ gS, ↓ Ci, ↑ E, ↓<br>cell viability, ↓ Cd <sup>2+</sup><br>uptake, ↓ H <sub>2</sub> O <sub>2</sub> , ↓ O <sub>2</sub> <sup>-</sup> ,<br>↓ LP, ↑ GSH/GSSG, ↑<br>SOD, POX, APX, CAT                                                                                     | [139] |
|  | Cd<br>4-8 mg mL <sup>-1</sup>       | <i>Cajanus<br/>cajan</i> L.      | ↓ growth, ↓ Chl,<br>↓ Mg <sup>2+</sup> , K <sup>+</sup> and Ca <sup>2+</sup><br>uptake, ↑ H <sub>2</sub> O <sub>2</sub> , ↑ LP,<br>↓ P <sub>N</sub> ,<br>↓ gS, ↓ E, ↑ EL, ↑<br><b>proline</b> ,<br>↑ SOD, CAT, GPX, and<br>APX                                                                                                             | 3 - 6 mM                 | ↑ growth, ↑ Chl,<br>↑ Mg <sup>2+</sup> , K <sup>+</sup> , Ca <sup>2+</sup><br>uptake, ↓ Cd <sup>2+</sup> uptake,<br>↓ H <sub>2</sub> O <sub>2</sub> , ↓ LP,<br>↑ P <sub>N</sub> ,<br>↑ gS, ↑ E,<br>↓ EL,<br>↑ SOD, CAT, GPX, and<br>APX                                                                              | [144] |
|  | Cu<br>25 μM                         | <i>Cicer<br/>arietinum</i> L.    | ↑ LP, ↓ Chl, ↑ <b>proline</b><br>(mainly in tolerant<br>genotypes), ↑<br>phytochelatin-SH, =<br>total acid-soluble SH,<br>= GSH, ↑ SOD and<br>CAT, ↓ APX                                                                                                                                                                                   | 1 mM                     | ↓ LP (in tolerant<br>genotypes), ↑<br>tolerance index,<br>= proteins                                                                                                                                                                                                                                                 | [212] |
|  | Cu<br>400 μM                        | <i>Triticum<br/>aestivum</i> L.  | ↓ growth, ↓ yield, ↓<br>Chl, ↑ total soluble<br>proteins, ↑ <b>proline</b> , ↓<br>P <sub>N</sub> ,<br>↓ Ci, ↓ gS, ↓ water-<br>use-efficiency, ↑ NPQ,<br>↓ photochemical<br>quenching, ↓ Electron<br>transport rate,<br>↓ productivity of PSII,<br>↑ SOD, CAT, POX, ↓<br>K <sup>+</sup> , Mg <sup>2+</sup> , and Ca <sup>2+</sup><br>uptake | 80 mM                    | ↑ growth, ↑ yield, ↑<br>Chl, ↑ P <sub>N</sub> , ↑ Ci,<br>↑ gS, ↑ water-use-<br>efficiency,<br>↓ NPQ, ↑<br>photochemical<br>quenching, ↑ electron<br>transport rate, ↑<br>productivity of PSII, ↑<br>SOD, CAT, POD<br>↓ Cu <sup>2+</sup> uptake, ↑ K <sup>+</sup> ,<br>Mg <sup>2+</sup> , and Ca <sup>2+</sup> uptake | [130] |

|  |                                                   |                                    |                                                                                                                                                                                                                                                                                                                                                                                       |       |                                                                                                                                                                                                                                                                                                                                                                    |       |
|--|---------------------------------------------------|------------------------------------|---------------------------------------------------------------------------------------------------------------------------------------------------------------------------------------------------------------------------------------------------------------------------------------------------------------------------------------------------------------------------------------|-------|--------------------------------------------------------------------------------------------------------------------------------------------------------------------------------------------------------------------------------------------------------------------------------------------------------------------------------------------------------------------|-------|
|  | Cr (VI)<br>0.6-20 mg<br>L <sup>-1</sup>           | <i>Oryza<br/>sativa</i> L.         | ↓ growth, ↑ root cell<br>death,<br>↑ LP, ↓ root length,<br>area, volume, and<br>diameter, ↑ root tip<br>and branch number                                                                                                                                                                                                                                                             | 1 μM  | = growth, = root<br>phenotype traits, ↓<br>root cell death,<br>↑ Cr(VI) uptake, ↓ LP                                                                                                                                                                                                                                                                               | [137] |
|  | Hg<br>0.2 mM                                      | <i>Oryza<br/>sativa</i> L.         | ↑ H <sub>2</sub> O <sub>2</sub> , ↑ O <sub>2</sub> <sup>-</sup> , ↑ LP, ↓<br>GSH, ↑ GSSG, ↓ Chl, ↑<br><b>proline</b>                                                                                                                                                                                                                                                                  | 2 mM  | ↓ H <sub>2</sub> O <sub>2</sub> , ↓ O <sub>2</sub> <sup>-</sup> , ↓ LP, ↓<br>Hg <sup>2+</sup> uptake                                                                                                                                                                                                                                                               | [132] |
|  | Hg<br>0.1-0.5 mM                                  | <i>Coriandrum<br/>sativum</i> L.   | ↑ LP, ↓ Chl, ↓ Car, ↓<br>anthocyanins, ↑<br><b>proline</b> ↑ GB, ↓<br>protein, ↑ CAT and<br>DHAR, ↓ SOD and<br>APX, ↓ AsA (at 0.5 mM<br>Hg), ↓ GSH (up to 0.3<br>mM Hg), ↓ phenolic<br>compounds                                                                                                                                                                                      | 50 mM | ↓ LP, ↑ Chl, ↑ Car, ↑<br>anthocyanins,<br>↑ GB, ↑ protein,<br>↑ SOD, APX, and<br>DHAR, ↓ CAT, ↑ GSH<br>(at 0.5 mM Hg),<br>↑ phenolic<br>compounds                                                                                                                                                                                                                  | [147] |
|  | Ni<br>200 μM                                      | <i>Atropa<br/>belladonna</i><br>L. | ↓ growth, ↑ LP, ↓ Put, ↑<br>Spm and Spd, ↑<br>oxidative degradation<br>of Spm and Spd, ↑<br>endogenous Pro                                                                                                                                                                                                                                                                            | 5 mM  | ↓ Ni <sup>2+</sup> uptake, ↓ LP, ↑<br>leaf water status, ↑ Fe<br>uptake, ↓ oxidative<br>degradation of Spm<br>and Spd                                                                                                                                                                                                                                              | [213] |
|  | Ni<br>100 μM                                      | <i>Pisum<br/>sativum</i> L.        | ↓ growth, ↓ Chl,<br>↓ photosynthetic<br>activity,<br>↓ <i>g<sub>s</sub></i> , ↓ <i>C<sub>i</sub></i> , ↓ RWC,<br>↓ membrane stability,<br>↑ H <sub>2</sub> O <sub>2</sub> , ↑ O <sub>2</sub> <sup>-</sup> , ↑ LP, ↑<br>EL, ↑ polyamines, ↑<br>ADC, ↑ ODC, ↑<br>SAMDC, ↑ <b>proline</b> ↑<br>GB, ↑ free amino<br>acids, ↑ soluble<br>sugars, ↑ phenolic<br>compounds, ↑<br>tocopherols | 60 mM | ↑ growth, ↑ Chl, ↑<br>photosynthetic<br>activity, ↑ <i>g<sub>s</sub></i> , ↑ <i>C<sub>i</sub></i> , ↑<br>RWC, ↑ membrane<br>stability, ↓ H <sub>2</sub> O <sub>2</sub> , ↓ O <sub>2</sub> <sup>-</sup> ,<br>↓ LP,<br>↓ EL, ↑ polyamines, ↑<br>ADC, ↑ ODC, ↑<br>SAMDC, = GB, ↑ free<br>amino acids, ↑ soluble<br>sugars, ↑ phenolic<br>compounds, ↑<br>tocopherols, | [83]  |
|  | Ni<br>100 μM                                      | <i>Pisum<br/>sativum</i> L.        | ↓ growth, ↓ Chl,<br>↓ photosynthetic<br>activity,<br>↓ <i>g<sub>s</sub></i> ,<br>↓ <i>C<sub>i</sub></i> , ↓ number of<br>stomata, ↓ stomatal<br>size,<br>↓ WUE,<br>↓ RWC,<br>↓ membrane stability,<br>↑ LP,<br>↑ EL, ↑ SOD, POX,<br>CAT, APX, GPX, and<br>GR                                                                                                                          | 60 mM | ↑ growth, ↑ Chl,<br>↑ photosynthetic<br>activity,<br>↑ <i>g<sub>s</sub></i> ,<br>= <i>C<sub>i</sub></i> , ↑ number of<br>stomata, = stomatal<br>size, ↑ WUE, ↑ RWC, ↑<br>membrane stability, ↓<br>LP, ↓ EL, ↑ SOD, POX,<br>CAT, APX, GPX, and<br>GR                                                                                                                | [141] |
|  | Ni<br>77 mg kg <sup>-1</sup><br>(Ni-rich<br>soil) | <i>Triticum<br/>aestivum</i> L.    | -                                                                                                                                                                                                                                                                                                                                                                                     | 20 mM | ↓ Ni uptake, ↑<br>photosynthetic rate, =<br><i>E</i> , = <i>g<sub>s</sub></i> , = <i>C<sub>i</sub></i> , = LP, ↓<br>H <sub>2</sub> O <sub>2</sub> , = O <sub>2</sub> <sup>-</sup> , ↑ SOD,<br>= CAT, APX and<br>DHAR, = grain<br>protein, fiber, starch,<br>polyphenols, and fat                                                                                   | [148] |



|                                                              |                                    |                                                                                                                                                                                                                                                                                                          |          |                                                                                                                                                                                                                                                                                                |       |
|--------------------------------------------------------------|------------------------------------|----------------------------------------------------------------------------------------------------------------------------------------------------------------------------------------------------------------------------------------------------------------------------------------------------------|----------|------------------------------------------------------------------------------------------------------------------------------------------------------------------------------------------------------------------------------------------------------------------------------------------------|-------|
| Pb<br>150-450<br>mg kg <sup>-1</sup>                         | <i>Olea<br/>europaea</i> L.        | ↓ growth, ↑ H <sub>2</sub> O <sub>2</sub> , ↑ LP,<br>↑ EL, ↑ SOD, GPX, and<br>APX, ↑ phenolics, ↑<br>flavonoids, ↑ DPPH <sup>•</sup><br>radical-scavenging<br>activity                                                                                                                                   | 20 mM    | ↑ growth, ↓ Pb <sup>2+</sup><br>uptake, ↓ H <sub>2</sub> O <sub>2</sub> , ↓ LP, ↓<br>EL, ↑ SOD, GPX, and<br>APX, ↑ phenolics, ↑<br>flavonoids, ↑ DPPH <sup>•</sup><br>radical-scavenging<br>activity                                                                                           | [145] |
| Pb<br>500 mg<br>kg <sup>-1</sup>                             | <i>Phaseolus<br/>vulgaris</i> L.   | ↓ growth, ↓ Chl, ↓<br>RWC, ↑ LP, = SOD,<br>CAT and APX                                                                                                                                                                                                                                                   | 25-50 mM | ↑ growth, ↑ Chl, ↑<br>RWC, ↓ Pb <sup>2+</sup> uptake, ↓<br>LP,<br>= SOD, CAT and APX                                                                                                                                                                                                           | [214] |
| Pb<br>7.5 mM                                                 | <i>Zea mays</i> L.                 | ↓ growth, ↓ yield, ↓<br>Chl and Car, ↑ <b>proline</b><br>↑ soluble sugars, ↑ LP,<br>↑ EL, ↑ GSH, ↑ AsA, ↑<br>free phenols, ↑ SOD,<br>POX, and CAT, ↓ N, P,<br>K <sup>+</sup> uptake                                                                                                                      | 7.5 mM   | ↑ growth, ↑ yield, ↑<br>Chl, ↑ soluble sugars,<br>↓ LP, = EL, ↓ GSH, ↓<br>AsA, ↓ free phenols, ↓<br>SOD, POX, and CAT, ↑<br>N, P, K <sup>+</sup> uptake, ↓ Pb <sup>2+</sup><br>uptake                                                                                                          | [129] |
| Pb<br>23959 mg<br>kg <sup>-1</sup> (Pb-<br>polluted<br>soil) | <i>Zea mays</i> L.                 | ↓ Chl, ↑ Car, ↑ GB, ↑<br>LP, = phenolics, ↑<br><b>proline</b>                                                                                                                                                                                                                                            | 5-10 mM  | ↑ Pb <sup>2+</sup> uptake, ↑ Pb <sup>2+</sup><br>efflux (at 10 mM), ↑<br>Chl (at 5 mM Pb), ↓<br>Chl (at 10 mM Pb), ↓<br>Car, ↓ LP (at 10 mM), ↓<br>GB, ↓ phenolics (at 5<br>mM Pb), ↑ phenolics<br>(at 10 mM Pb)                                                                               | [146] |
| As<br>5-500 μM                                               | <i>Oryza<br/>sativa</i> L.         | ↑ soluble proteins, ↓<br>free amino acids, ↑<br><b>proline</b> , ↓ RNase, ↓<br>protease, ↓ leucine<br>aminopeptidase, ↑<br>carboxypeptidase                                                                                                                                                              | 1 M      | ↑ RNase                                                                                                                                                                                                                                                                                        | [215] |
| As<br>5-25 μM                                                | <i>Solanum<br/>melongena</i><br>L. | ↓ growth, ↓ Chl, ↓ Chl<br>fluorescence<br>parameters, ↑ H <sub>2</sub> O <sub>2</sub> , ↑<br>O <sub>2</sub> <sup>-</sup> , ↑ LP, ↑ SOD, POX,<br>and CAT, ↓ GST, ↑<br><b>proline</b> ↑ P5CS, ↓<br>ProDH                                                                                                   | 25 μM    | ↑ growth, ↑ Chl, ↓ As<br>uptake, ↑ yield of<br>electron transport per<br>trapped excitation,<br>↑ Φ PSII, ↑<br>performance index of<br>PSII, ↓ H <sub>2</sub> O <sub>2</sub> , ↓ O <sub>2</sub> <sup>-</sup> , ↓<br>LP, ↑ SOD, POX, CAT,<br>and GST, ↑ P5CS, ↓<br>ProDH                        | [142] |
| As<br>75 μM                                                  | <i>Glycine<br/>max</i> L.          | ↓ growth, ↑ H <sub>2</sub> O <sub>2</sub> , ↑<br>O <sub>2</sub> <sup>-</sup> ,<br>↑ LP, ↓ membrane<br>stability,<br>↓ DNA content, ↑ DNA<br>oxidation, ↑ DNase<br>activity, ↑ DNA<br>fragmentation, ↑<br><b>proline</b> , ↓ genomic<br>template stability, ↑<br>DNA polymorphism, ↓<br>SOD, CAT, and APX | 10 mM    | ↑ growth, ↓ As uptake,<br>↓ H <sub>2</sub> O <sub>2</sub> , ↓ O <sub>2</sub> <sup>-</sup> , ↓ LP, ↑<br>membrane stability, ↑<br>DNA content, ↓ DNA<br>oxidation, ↓ DNase, ↓<br>DNA fragmentation, ↑<br>genomic template<br>stability, ↓ DNA<br>polymorphism,<br>↑ SOD, CAT, and APX,<br>↑ P5CS | [134] |

|                    |                                     |                                     |                                                                                                                                                                                                                                                  |                       |                                                                                                                                                                                        |       |
|--------------------|-------------------------------------|-------------------------------------|--------------------------------------------------------------------------------------------------------------------------------------------------------------------------------------------------------------------------------------------------|-----------------------|----------------------------------------------------------------------------------------------------------------------------------------------------------------------------------------|-------|
|                    | Se<br>4-6 ppm                       | <i>Phaseolus vulgaris</i> L.        | ↓ growth, ↓ cellular respiration, ↓ Chl, ↓ leaf water content (at 6 ppm Se), ↑ EL, ↑ membrane damage, ↑ LP, ↑ H <sub>2</sub> O <sub>2</sub> , ↑ SOD, CAT and APX (at 4 ppm), ↓ APX and GR (at 6 ppm), ↓ AsA and GSH (at 6 ppm), ↓ <b>proline</b> | 50 μM                 | ↑ growth, ↑ Chl, ↑ cellular respiration, ↑ leaf water content (from 6 ppm Se), ↓ EL, ↓ LP, ↓ H <sub>2</sub> O <sub>2</sub> , ↓ membrane damage, ↑ SOD, CAT, APX, and GR, ↑ AsA and GSH | [143] |
|                    | Se<br>250 μM                        | <i>Nicotiana tabacum</i> L.         | ↓ biomass, ↑ cell death, ↑ intracellular ROS, ↑ SOD, CAT, APX, and POX                                                                                                                                                                           | 5-10 mM               | ↑ APX and POX, ↑ Se uptake                                                                                                                                                             | [135] |
| <b>Xenobiotics</b> | Basagran® herbicide (bentazone 48%) | <i>Trigonella foenum-graecum</i> L. | ↓ root growth, ↓ shoot fresh and dry weight, = RWC, ↓ Chl, = Car, ↑ H <sub>2</sub> O <sub>2</sub> , ↑ LP, = EL, = GSH, = TAC, ↑ <b>proline</b> , ↑ P5C, ↑ P5CS, ↓ <b>Proline</b> dehydrogenase (ProDH), ↑ CAT, ↑ GST                             | 7 mM (seed treatment) | ↑ growth, ↑ shoot and root fresh weight, = RWC, = Chl, = Car, ↓ H <sub>2</sub> O <sub>2</sub> , ↓ LP, = EL, ↑ GSH, = TAC, ↓ <b>proline</b> , ↓ P5C, ↓ P5CS, ↑ ProDH, ↓ CAT, ↓ GST      | [179] |

↑, ↓, and = symbolize the reported increase, decrease or maintenance of a certain parameter, respectively.

ABA, abscisic acid; APX, ascorbate peroxidase; AsA, ascorbate; Asp, asparagine; BR, brassinosteroids; CA, carbonic anhydrase; Car, carotenoids; CAT, catalase; Chl, chlorophylls; Ci, intercellular CO<sub>2</sub> concentration; CK, cytokinins; DHAR, dehydroascorbate reductase; DPPH, 2,2-diphenyl-1-picrylhydrazyl; E, transpiration rate; EL, electrolyte leakage; Fv/Fm, maximum quantum yield of PSII; GA<sub>3</sub>, gibberellic acid; GB, glycine betaine; GDH, glutamate dehydrogenase; Glu, glutamate; Gly I, glyoxalase I; Gly II, glyoxalase II; GOGAT, glutamate synthase; GPX, glutathione peroxidase; GR, glutathione reductase; gs, stomatal conductance; GS, glutamine synthetase; GSH, glutathione; GSSG, glutathione disulfide; GST, glutathione S-transferase; GST, glutathione S-transferases; H<sub>2</sub>O<sub>2</sub>, hydrogen peroxide; IAA: indole acetic acid; JA, jasmonic acid; LP, lipid peroxidation; MDA, malondialdehyde; MDHAR, monodehydroascorbate reductase; NADPH, nicotinamide adenine dinucleotide phosphate; NPQ, non-photochemical quenching; NR, nitrate reductase; O<sub>2</sub>·<sup>-</sup>, superoxide anion; OAT, ornithine aminotransferase; P5C, pyrroline-5-carboxylate; P5CS, pyrroline-5-carboxylate synthase; PN, net photosynthetic rate; POX, peroxidase; PPO, polyphenol oxidase; ProDH, proline dehydrogenase; PTS, trisodium-8-hydroxy-1,3,6-pyrenetrisulphonic acid; Put, putrescine; ROS, reactive oxygen species; RuBisCO, ribulose-1,5-bisphosphate carboxylase-oxygenase; RWC, relative water content; SA, salicylic acid; SAMDC, S-adenosylmethionine decarboxylase; SOD, superoxide dismutase; Spd, spermidine; Spm, spermine; TAC, total antioxidant capacity; WUE, water use efficiency; Φ PSII, quantum yield of PSII.

**Table S3**

Effects on overall plant physiology and on the proline accumulation in plants facing heavy-metal-induced stress.

| Stress factor |                                   | Plant species                                  | Effects on overall plant physiology                                                                                                                                                                    | Effects on the proline accumulation                                                               | Author notes                                                                                                                                                                                                                                                                               | Citation |
|---------------|-----------------------------------|------------------------------------------------|--------------------------------------------------------------------------------------------------------------------------------------------------------------------------------------------------------|---------------------------------------------------------------------------------------------------|--------------------------------------------------------------------------------------------------------------------------------------------------------------------------------------------------------------------------------------------------------------------------------------------|----------|
| Heavy metals  | Cu<br>1 - 1000 $\mu\text{M}$      | <i>Silene vulgaris</i> (Moench) Garcke         | $\downarrow$ root growth,<br>$\downarrow$ leaf water content                                                                                                                                           | $\uparrow$ <b>proline</b> accumulation in the leaves, no <b>proline</b> accumulation in the roots | <b>proline</b> accumulation related to the alleviation of water deficit, but not with the prevention of direct toxic effects of the HMs. Leaves of the tolerant ecotype did not show any accumulation of <b>proline</b> under Cu- or Zn-exposure, nor to Cd levels below 100 $\mu\text{M}$ | [128]    |
|               | Cd<br>1 - 1000 $\mu\text{M}$      |                                                |                                                                                                                                                                                                        |                                                                                                   |                                                                                                                                                                                                                                                                                            |          |
|               | Zn<br>1 - 1000 $\mu\text{M}$      |                                                |                                                                                                                                                                                                        |                                                                                                   |                                                                                                                                                                                                                                                                                            |          |
|               | Cd<br>10-100 $\mu\text{g g}^{-1}$ | <i>Solanum melongena</i> L.                    | $\downarrow$ biomass,<br>$\downarrow$ SOD, C in roots,<br>$\downarrow$ shoot PCs synthesis,<br>$\uparrow$ LP                                                                                           | no <b>proline</b> accumulation                                                                    | Cd-induced oxidative stress occurs in <i>S. nigrum</i> without affecting growth; free <b>proline</b> accumulation and antioxidant defenses (but not PCs production) seem to play an important role against oxidative stress in Cd tolerance in the hyperaccumulator species                | [126]    |
|               |                                   | <i>Solanum nigrum</i> L. (Cd-hyperaccumulator) | $\uparrow$ root SOD,<br>$\uparrow$ shoot POX, $\uparrow$ CAT,<br>$\uparrow$ accumulation of Cd in shoots,<br>$\uparrow$ shoot PCs synthesis                                                            | $\uparrow$ <b>proline</b> accumulation (mainly in the roots)                                      |                                                                                                                                                                                                                                                                                            |          |
|               | Ni<br>10-200 $\mu\text{M}$        | <i>Triticum aestivum</i> L.                    | $\downarrow$ growth, $\downarrow$ RWC,<br>$\uparrow$ accumulation of Ni,<br>$\uparrow$ H <sub>2</sub> O <sub>2</sub> , $\downarrow$ SOD, $\downarrow$ shoot CAT,<br>$\uparrow$ shoot APX, POX and GST, | $\uparrow$ <b>proline</b> accumulation (mainly in shoots)                                         | Although Ni accumulation and growth reduction were less pronounced in the shoots, these organs were more responsive to Ni stress in terms of AOX activity and <b>proline</b> accumulation. Ni-stressed enhancement of <b>proline</b> might be associated with osmoprotective processes     | [113]    |
|               | Pb<br>50-500 $\text{mg kg}^{-1}$  | <i>Cymbopogon flexuosus</i> Stapf.             | -                                                                                                                                                                                                      | $\uparrow$ <b>proline</b> accumulation (mainly in young leaves)                                   | Cd is the strongest inducer of <b>proline</b> accumulation. <b>proline</b> accumulation can be used as a biochemical indicator for HM-stress in lemongrass. Over long term exposure to HMs, <b>proline</b> accumulation decreases                                                          | [108]    |
|               | Hg<br>50-500 $\text{mg kg}^{-1}$  |                                                |                                                                                                                                                                                                        |                                                                                                   |                                                                                                                                                                                                                                                                                            |          |
|               | Cd<br>50-200 $\text{mg kg}^{-1}$  |                                                |                                                                                                                                                                                                        |                                                                                                   |                                                                                                                                                                                                                                                                                            |          |

|                                                                                                          |                                                            |                                                                                                                                                                                                                                         |                                                                          |                                                                                                                                                                                                                                                                                                                                                           |       |
|----------------------------------------------------------------------------------------------------------|------------------------------------------------------------|-----------------------------------------------------------------------------------------------------------------------------------------------------------------------------------------------------------------------------------------|--------------------------------------------------------------------------|-----------------------------------------------------------------------------------------------------------------------------------------------------------------------------------------------------------------------------------------------------------------------------------------------------------------------------------------------------------|-------|
| Cd<br>50 -<br>400 $\mu$ M                                                                                | <i>Atriplex halimus</i><br>subsp.<br><i>schweinfurthii</i> | ↓ growth, ↓ Chl, ↓<br>transpiration and root<br>hydraulic conductivity,<br>↑ Cd uptake (mainly in<br>the roots)                                                                                                                         | ↑ <b>proline</b><br>accumulation<br>(mainly in the<br>roots)             | <i>A. halimus</i> provides a<br>new plant resource<br>with potential for Cd<br>hyperaccumulation                                                                                                                                                                                                                                                          | [124] |
| Ni<br>50 mM                                                                                              | <i>Triticum aestivum</i><br>L.                             | ↓ growth, ↓ Chl,<br>↓ CA,<br>↑ LP,<br>↑ EL, ↓ CAT                                                                                                                                                                                       | ↑ <b>proline</b><br>accumulation                                         | Enhanced <b>proline</b><br>levels improve osmotic<br>adjustment, membrane<br>stability and ROS<br>scavenging activity. The<br>production of <b>proline</b><br>was higher in plants<br>co-exposed to GA <sub>3</sub> and<br>Ca <sup>2+</sup> , which explains the<br>alleviation of Ni toxicity<br>and reduction of<br>oxidative damage in<br>these plants | [115] |
| Cr<br>0.4 mM                                                                                             | <i>Raphanus sativus</i><br>L.                              | ↓ growth,<br>↓ Chl and Car,<br>↓ Hill reaction activity,<br>↑ marginal chlorosis,<br>↑ LP,<br>↑ sugars, ↓ protein,<br>↓ GR and CAT,<br>↓ uptake and<br>translocation of Fe, S, P<br>and Zn,<br>↑ Cr accumulation in<br>the roots        | ↑ <b>proline</b><br>accumulation<br>in leaves                            | -                                                                                                                                                                                                                                                                                                                                                         | [121] |
| Ni<br>2 mM                                                                                               | <i>Glycine max</i> L.                                      | ↓ germination rate, ↓<br>growth, ↓ Fv/Fm, ↓<br>photochemical<br>quenching, ↑ NPQ, ↑<br>GB, ↓ total protein, ↑<br>total soluble sugar, ↑<br>H <sub>2</sub> O <sub>2</sub> , ↑ LP, ↑ NADPH<br>oxidase, ↑ SOD, CAT,<br>APX, and POX, ↑ AsA | ↑ <b>proline</b><br>accumulation                                         | <b>proline</b> is a potential<br>indicator of stress<br>tolerance. <b>proline</b><br>accumulation was<br>further induced by co-<br>exposure to JA,<br>possibly acting as an<br>AOX to protect the<br>cells from the oxidative<br>burst                                                                                                                    | [116] |
| Cr (III)<br>3, 12,<br>30 mg<br>L <sup>-1</sup><br><br>Cr (VI)<br>1.6, 6.4,<br>12.8<br>mg L <sup>-1</sup> | <i>Oryza sativa</i> L.                                     | ↑ Cr accumulation                                                                                                                                                                                                                       | ↑ short-term<br><b>proline</b><br>accumulation<br>in leaves and<br>roots | <b>proline</b> from roots and<br>shoots showed similar<br>responses to Cr(III)<br>exposure, but in<br>response to Cr(VI).<br><b>proline</b> accumulation<br>was more sensitive in<br>shoots than in roots                                                                                                                                                 | [137] |
| Cd<br>25 -<br>100<br>ppm                                                                                 | <i>Ricinus communis</i><br>L.                              | ↓ growth,<br>↓ water content,<br>↓ Chl and Car,<br>↑ total phenolics                                                                                                                                                                    | ↑ <b>proline</b><br>accumulation<br>in both leaves<br>and roots          | Free <b>proline</b><br>demonstrated positive<br>correlations with Cd-<br>accumulation,<br>phenolics and dry<br>biomass                                                                                                                                                                                                                                    | [216] |
| Ni<br>100<br>mM                                                                                          | <i>Solanum nigrum</i> L.                                   | ↓ biomass production,<br>= root elongation, ↓<br>Chl, ↓ RuBisCO, ↑ Ni<br>accumulation in roots,<br>↓ protein, ↓ H <sub>2</sub> O <sub>2</sub> , ↑<br>O <sub>2</sub> .- in roots, ↑ SOD, ↑<br>CAT in roots, ↑ APX in<br>shoots           | ↑ <b>proline</b><br>accumulation<br>(mainly in the<br>roots)             | In roots, increase of<br><b>proline</b> contributed to<br>the enhancement of<br>tolerance of <i>S. nigrum</i><br>plants to Ni                                                                                                                                                                                                                             | [125] |

|                                              |                                                            |                                                                                                                                                                     |                                                      |                                                                                                                |       |
|----------------------------------------------|------------------------------------------------------------|---------------------------------------------------------------------------------------------------------------------------------------------------------------------|------------------------------------------------------|----------------------------------------------------------------------------------------------------------------|-------|
| Ni<br>10 -<br>200 $\mu$ M                    | <i>Oryza sativa</i> L.                                     | ↓ growth, ↓ Chl, ↑ LP, ↑ H <sub>2</sub> O <sub>2</sub> , ↓ soluble proteins in shoots, ↓ soluble sugars, ↓ SOD, ↑ POX and CAT, ↑ AsA and GSH (mainly in the shoots) | ↑ <b>proline</b> accumulation (mainly in the shoots) | <b>proline</b> is reported to increase as a result of increasing Ni stress                                     | [121] |
| Pb and Zn<br>25 -<br>100 mg kg <sup>-1</sup> | <i>Raphanus sativus</i> L. and <i>Brassica oleracea</i> L. | ↓ plant biomass, ↓ Chl and Car, ↑ phenolics in shoots                                                                                                               | ↑ <b>proline</b> accumulation in shoots              | no visible symptoms of metal toxicity and high survival rates can be related to the increase of <b>proline</b> | [115] |
| Ni<br>50 $\mu$ M                             | <i>Solanum lycopersicum</i> L.                             | ↓ growth, ↓ plant biomass, ↑ H <sub>2</sub> O <sub>2</sub> , ↑ O <sub>2</sub> <sup>-</sup> in shoots, ↑ GSH and AsA                                                 | ↑ <b>proline</b> accumulation (mainly in the shoots) | <b>proline</b> accumulation resembled a signal of stress sensitivity                                           | [122] |

↑, ↓, and = symbolize the reported increase, decrease or maintenance of a certain parameter, respectively.

ABA, abscisic acid; APX, ascorbate peroxidase; AsA, ascorbate; Asp, asparagine; BR, brassinosteroids; CA, carbonic anhydrase; Car, carotenoids; CAT, catalase; Chl, chlorophylls; *C<sub>i</sub>*, intercellular CO<sub>2</sub> concentration; CK, cytokinins; DHAR, dehydroascorbate reductase; DPPH, 2,2-diphenyl-1-picrylhydrazyl; *E*, transpiration rate; EL, electrolyte leakage; Fv/Fm, maximum quantum yield of PSII; GA<sub>3</sub>, gibberellic acid; GB, glycine betaine; GDH, glutamate dehydrogenase; Glu, glutamate; Gly I, glyoxalase I; Gly II, glyoxalase II; GOGAT, glutamate synthase; GPX, glutathione peroxidase; GR, glutathione reductase; *g<sub>s</sub>*, stomatal conductance; GS, glutamine synthetase; GSH, glutathione; GSSG, glutathione disulfide; GST, glutathione S-transferase; GST, glutathione S-transferases; H<sub>2</sub>O<sub>2</sub>, hydrogen peroxide; IAA: indole acetic acid; JA, jasmonic acid; LP, lipid peroxidation; MDA, malondialdehyde; MDHAR, monodehydroascorbate reductase; NADPH, nicotinamide adenine dinucleotide phosphate; NPQ, non-photochemical quenching; NR, nitrate reductase; O<sub>2</sub><sup>-</sup>, superoxide anion; OAT, ornithine aminotransferase; P5C, pyrroline-5-carboxylate; P5CS, pyrroline-5-carboxylate synthase; P<sub>N</sub>, net photosynthetic rate; POX, peroxidase; PPO, polyphenol oxidase; ProDH, proline dehydrogenase; PTS, trisodium-8-hydroxy-1,3,6-pyrenetrisulphonic acid; Put, putrescine; ROS, reactive oxygen species; RuBisCO, ribulose-1,5-bisphosphate carboxylase-oxygenase; RWC, relative water content; SA, salicylic acid; SAMDC, S-adenosylmethionine decarboxylase; SOD, superoxide dismutase; Spd, spermidine; Spm, spermine; TAC, total antioxidant capacity; WUE, water use efficiency; Φ PSII, quantum yield of PSII.

**Table S4**

Effects of applying stress mitigators to plants facing xenobiotics-induced stress, namely on the endogenous levels of proline.

| Stress factor |                                                      | Plant species                      | Stress-induced effects in comparison to the control                                                                                                                                                                                                                                                                                                                                                                                                                                                                                                                                                               | Mitigation treatment                              | Treatment-induced effects in comparison to the stress factor                                                                                                                                                                                                                                                                                                                                                                                                                                                                                                                             | Reference |
|---------------|------------------------------------------------------|------------------------------------|-------------------------------------------------------------------------------------------------------------------------------------------------------------------------------------------------------------------------------------------------------------------------------------------------------------------------------------------------------------------------------------------------------------------------------------------------------------------------------------------------------------------------------------------------------------------------------------------------------------------|---------------------------------------------------|------------------------------------------------------------------------------------------------------------------------------------------------------------------------------------------------------------------------------------------------------------------------------------------------------------------------------------------------------------------------------------------------------------------------------------------------------------------------------------------------------------------------------------------------------------------------------------------|-----------|
| Xenobiotics   | 0.4 - 1.6 g ha <sup>-1</sup><br>Clopyralid herbicide | <i>Brassica juncea</i> (L.) Czern. | ↓ leaf water content, ↑ leaf temperature, ↓ Chl, ↓ Car, ↑ H <sub>2</sub> O <sub>2</sub> , ↑ LP, ↑ <b>proline</b> ↑ CAT, ↑ POD                                                                                                                                                                                                                                                                                                                                                                                                                                                                                     | Foliar spray or seed priming with SA (500 μM)     | ↑ leaf water content, ↓ leaf temperature, ↑ Chl, ↑ Car, ↓ H <sub>2</sub> O <sub>2</sub> , ↓ LP, ↓ <b>proline</b> ↓ CAT, ↓ POD                                                                                                                                                                                                                                                                                                                                                                                                                                                            | [216]     |
|               | 30 mg kg <sup>-1</sup><br>Glyphosate herbicide       | <i>Hordeum vulgare</i> L.          | ↓ root growth, ↓ leaf and root fresh weight, = Chl, = Car, = relative RuBisco, ↑ leaf and root LP, ↑ leaf and root H <sub>2</sub> O <sub>2</sub> , = leaf O <sub>2</sub> <sup>-</sup> , ↑ root O <sub>2</sub> <sup>-</sup> , ↓ leaf AsA/DHA, ↓ leaf AsA/total AsA, ↑ leaf DHA/total AsA, = leaf total thiols, ↓ leaf protein thiols/total thiols, ↑ leaf non-protein thiols/total thiols, ↑ <b>leaf and root proline</b> , ↓ root total thiols, = root protein thiols/total thiols, = root non-protein thiols/total thiols, ↑ leaf and root SOD, ↑ leaf CAT, ↓ root CAT, ↑ leaf and root APX, ↑ leaf and root GST | Watering with SA (100 and 500 μM)                 | = root growth, = leaf and root fresh weight, = Chl, = Car, = relative RuBisco; = leaf and root LP, ↓ leaf and root H <sub>2</sub> O <sub>2</sub> , = leaf and root O <sub>2</sub> <sup>-</sup> , = leaf AsA/DHA, = leaf AsA/total AsA, = leaf DHA/total AsA, = leaf total thiols, ↓ leaf protein thiols/total thiols, ↑ leaf non-protein thiols/total thiols, ↓ <b>leaf and root proline</b> , = root total thiols, = root protein thiols/total thiols, = root non-protein thiols/total thiols, ↑ leaf and root SOD, = leaf CAT, ↑ root CAT, = leaf APX, ↓ root APX, = leaf and root GST | [217]     |
|               | 1500 g ha <sup>-1</sup><br>Chlorothalonil fungicide  | <i>Vitis vinifera</i> L.           | = protein, = <b>proline</b> , ↑ LP, ↑ SOD, ↑ APX, ↓ CAT, ↑ POX, = AsA, = GSH, ↑ GR, ↑ GST, = GSH, = GR, = GST, = MRP, ↑ P450, ↑ Chlorothalonil residue                                                                                                                                                                                                                                                                                                                                                                                                                                                            | Foliar spray of 24-epibrassinolide (0.10-0.42 μM) | = protein, ↑ <b>proline</b> , = LP, = SOD, = APX, ↓ CAT, ↓ POX, = AsA, ↑ GSH, ↓ GR, ↑ GST, ↑ GSH, ↑ GR, ↑ GST, = MRP, = P450, ↓ Chlorothalonil residue                                                                                                                                                                                                                                                                                                                                                                                                                                   | [183]     |
|               | 0.5 mM<br>Glyphosate herbicide                       | <i>Triticum aestivum</i> L.        | ↓ shoot and root length, ↓ shoot and root fresh weight, = H <sub>2</sub> O <sub>2</sub> , ↑ LP, ↑ <b>proline</b> , ↓ thiols, ↓ total phenols, ↑                                                                                                                                                                                                                                                                                                                                                                                                                                                                   | Foliar spray of 24-epibrassinolide (1 μM)         | ↑ shoot length, = root length, ↑ shoot fresh weight, = root fresh weight, = H <sub>2</sub> O <sub>2</sub> , ↓ LP, = <b>proline</b> , = thiols, ↑ total phenols, ↓                                                                                                                                                                                                                                                                                                                                                                                                                        | [180]     |

|                                                   |                                                         |  |                                                                                                                                                                                                                                                                                                                                                                                                                                                                                                                                                                                                                                                                                                                                                                                                                              |                                                                                                                        |                                                                                                                                                                                                                                                                                                                                                                                                                                                                                                                                                                                                                                                                                                                      |       |
|---------------------------------------------------|---------------------------------------------------------|--|------------------------------------------------------------------------------------------------------------------------------------------------------------------------------------------------------------------------------------------------------------------------------------------------------------------------------------------------------------------------------------------------------------------------------------------------------------------------------------------------------------------------------------------------------------------------------------------------------------------------------------------------------------------------------------------------------------------------------------------------------------------------------------------------------------------------------|------------------------------------------------------------------------------------------------------------------------|----------------------------------------------------------------------------------------------------------------------------------------------------------------------------------------------------------------------------------------------------------------------------------------------------------------------------------------------------------------------------------------------------------------------------------------------------------------------------------------------------------------------------------------------------------------------------------------------------------------------------------------------------------------------------------------------------------------------|-------|
|                                                   |                                                         |  | SOD, ↑ CAT, ↑ GPX,<br>↑ GR, ↑ GST                                                                                                                                                                                                                                                                                                                                                                                                                                                                                                                                                                                                                                                                                                                                                                                            |                                                                                                                        | SOD, ↑ CAT, ↑ GPX,<br>= GR, ↑ GST                                                                                                                                                                                                                                                                                                                                                                                                                                                                                                                                                                                                                                                                                    |       |
| 400 mg kg <sup>-1</sup><br>Acetaminophen          | <i>Hordeum<br/>vulgare</i> L.                           |  | = root length, =<br>leaf fresh weight, ↓<br>leaf dry weight, ↓<br>root fresh and dry<br>weight,<br>= Chl, = Car, ↑ leaf<br>GS, = root GS, =<br>leaf NR, ↓ root NR,<br>= leaf and root LP,<br>↑ leaf O <sub>2</sub> <sup>-</sup> , = root<br>O <sub>2</sub> <sup>-</sup> , = leaf H <sub>2</sub> O <sub>2</sub> , ↑<br>root H <sub>2</sub> O <sub>2</sub> , = leaf<br>total thiols, ↑ root<br>total thiols, = leaf<br>protein-bond<br>thiols, ↑ root<br>protein-bond<br>thiols,<br>↑ <b>leaf proline</b> ,<br>= <b>root proline</b><br>= leaf total AsA, ↓<br>root total AsA, =<br>leaf and root<br>AsA/total AsA, =<br>leaf and root<br>DHA/total AsA, ↑<br>leaf SOD, = root<br>SOD, ↓ leaf CAT, =<br>leaf and root APX,<br>↑ leaf <i>HvAPX</i> , ↑ leaf<br><i>HvSOD</i> , ↑ leaf<br><i>HvCAT1</i> , = leaf<br><i>HvCAT2</i> | Silicon dioxide<br>nanomaterial<br>(nano-SiO <sub>2</sub> ; 3<br>mg kg <sup>-1</sup> )                                 | = root length, ↓ leaf<br>fresh weight, = root<br>fresh weight, = leaf<br>and root dry<br>weight,<br>= Chl, = Car, = leaf<br>and root GS, ↓ leaf<br>NR, ↑ root NR, =<br>leaf and root LP, =<br>leaf and root O <sub>2</sub> , =<br>leaf and root H <sub>2</sub> O <sub>2</sub> ,<br>↑ leaf total thiols, =<br>root total thiols, =<br>leaf and root<br>protein-bond<br>thiols,<br>= <b>leaf proline</b> ,<br>↓ <b>root proline</b> ,<br>= leaf and root<br>total AsA, = leaf<br>and root AsA/total<br>AsA, = leaf and<br>root DHA/total<br>AsA, = leaf and<br>root SOD, = leaf<br>CAT, = leaf APX, ↑<br>root APX, ↓ leaf<br><i>HvAPX</i> , ↓ leaf<br><i>HvSOD</i> , ↓ leaf<br><i>HvCAT1</i> , = leaf<br><i>HvCAT2</i> | [173] |
| 10 mg kg <sup>-1</sup><br>Glyphosate<br>herbicide | <i>Solanum<br/>lycopersicum</i><br>L. cv. Micro-<br>Tom |  | ↓ root length, ↓<br>root and shoot<br>fresh weight,<br>↑ shoot LP, ↓ root<br>LP, ↑ shoot and<br>root O <sub>2</sub> <sup>-</sup> ,<br>= shoot and root<br>H <sub>2</sub> O <sub>2</sub><br>↑ <b>shoot and root<br/>proline</b> , ↑ shoot<br>and root GSH, ↑<br>shoot AsA, = root<br>AsA, ↑ shoot total<br>AsA, = root total<br>AsA, = shoot<br>AsA/total AsA, ↑<br>root AsA/total AsA,<br>= shoot and root<br>DHA/total AsA, ↓<br>shoot AsA/DHA, ↑<br>root AsA/DHA, =<br>shoot SOD, ↓ root<br>SOD, ↓ shoot CAT<br>and APX, ↓ root<br>CAT and APX, =<br>shoot and root GR,<br>↓ shoot DHAR, =<br>root DHAR                                                                                                                                                                                                                    | Foliar spray of<br>Na <sub>2</sub> SiO <sub>3</sub> ·5H <sub>2</sub> O<br>(1 mM) or<br>nano-SiO <sub>2</sub> (1<br>mM) | ↑ root length, ↑<br>root fresh weight, =<br>shoot fresh weight,<br>↓ shoot LP, = root<br>LP, = shoot O <sub>2</sub> , ↓<br>root O <sub>2</sub> <sup>-</sup> , = shoot<br>H <sub>2</sub> O <sub>2</sub> , ↓ root H <sub>2</sub> O <sub>2</sub> , ↓<br><b>shoot and root<br/>proline</b> , = shoot<br>GSH, ↓ root GSH, =<br>shoot and root<br>AsA, = shoot and<br>root total AsA, =<br>shoot and root<br>AsA/total AsA =<br>shoot and root<br>DHA/total AsA, =<br>shoot AsA/DHA, ↓<br>root AsA/DHA, =<br>shoot SOD, ↑ root<br>SOD, ↑ shoot CAT<br>and APX, ↑ root<br>CAT and APX, ↑<br>shoot GR, = root<br>GR, ↑ shoot DHAR,<br>= root DHAR, ↓<br>root glyphosate<br>accumulation                                      | [167] |
| 4 μM                                              | <i>Oryza sativa</i><br>L.                               |  | ↓ growth, = Chl, ↓<br>Car, ↑ LP, ↑ O <sub>2</sub> <sup>-</sup> , ↑                                                                                                                                                                                                                                                                                                                                                                                                                                                                                                                                                                                                                                                                                                                                                           | Seedling<br>treatment with                                                                                             | ↑ growth, ↑ Chl, ↑<br>Car, ↓ LP, ↓ O <sub>2</sub> <sup>-</sup> , ↓                                                                                                                                                                                                                                                                                                                                                                                                                                                                                                                                                                                                                                                   | [218] |

|  |                                             |                                              |                                                                                                                                                                                                                                                                                                                                                                                                                                                                                                                                        |                                          |                                                                                                                                                                                                                                                                                                                                                                                                                                                                                                                                                       |       |
|--|---------------------------------------------|----------------------------------------------|----------------------------------------------------------------------------------------------------------------------------------------------------------------------------------------------------------------------------------------------------------------------------------------------------------------------------------------------------------------------------------------------------------------------------------------------------------------------------------------------------------------------------------------|------------------------------------------|-------------------------------------------------------------------------------------------------------------------------------------------------------------------------------------------------------------------------------------------------------------------------------------------------------------------------------------------------------------------------------------------------------------------------------------------------------------------------------------------------------------------------------------------------------|-------|
|  | Butachlor herbicide                         |                                              | H <sub>2</sub> O <sub>2</sub> , ↑ <b>proline</b> , ↑ P5CS, ↓ ProDH, ↓ shoot protein, ↓ AsA, ↑ DHA, ↓ AsA/DHA, ↓ GSH, ↑ shoot GSSG, ↓ GSH/GSSG, ↓ APX, GR, MDHAR and DHAR                                                                                                                                                                                                                                                                                                                                                               | Na <sub>2</sub> SiO <sub>3</sub> (10 μM) | H <sub>2</sub> O <sub>2</sub> , ↓ <b>proline</b> , ↓ P5CS, ↑ ProDH, ↑ proteins, ↑ AsA, ↓ DHA, ↑ AsA/DHA, ↑ GSH, = GSSG, ↑ GSH/GSSG, ↑ APX, GR, MDHAR and DHAR                                                                                                                                                                                                                                                                                                                                                                                         |       |
|  | 10 mg kg <sup>-1</sup> Glyphosate herbicide | <i>Solanum lycopersicum</i> L. cv. Micro-Tom | ↓ root length, ↓ root and shoot fresh weight, ↑ shoot protein, ↓ root protein, ↓ shoot NR, = root NR, ↑ shoot LP, ↓ root LP, = shoot and root H <sub>2</sub> O <sub>2</sub> , ↑ shoot and root O <sub>2</sub> <sup>-</sup> , ↑ <b>shoot and root proline</b> , = shoot and root total AsA, = shoot and root AsA/DHA, ↑ shoot and root GSH, = shoot TAC, ↓ root TAC, ↓ shoot total phenols, = root total phenols, ↓ shoot flavonoids, = root flavonoids, = shoot SOD, ↓ root SOD, ↓ shoot GST, ↓ root GST, ↓ shoot and root APX and CAT | Sodium nitroprusside (200 μM)            | = root length, ↑ root fresh weight, = shoot fresh weight, = shoot protein, ↑ root protein, = shoot and root NR, = shoot and root LP, = shoot H <sub>2</sub> O <sub>2</sub> , ↓ root H <sub>2</sub> O <sub>2</sub> , ↓ shoot and root O <sub>2</sub> <sup>-</sup> , ↓ <b>shoot and root proline</b> , = shoot and root total AsA, = shoot and root AsA/DHA, = shoot GSH, ↓ root GSH, = shoot and root TAC, = shoot and root total phenols, = shoot and root flavonoids, = shoot SOD, ↑ root SOD, ↑ shoot GST, = root GST, ↑ shoot and root APX and CAT | [168] |

↑, ↓, and = symbolize the reported increase, decrease or maintenance of a certain parameter, respectively.

ABA, abscisic acid; APX, ascorbate peroxidase; AsA, ascorbate; Asp, asparagine; BR, brassinosteroids; CA, carbonic anhydrase; Car, carotenoids; CAT, catalase; Chl, chlorophylls; *C<sub>i</sub>*, intercellular CO<sub>2</sub> concentration; CK, cytokinins; DHAR, dehydroascorbate reductase; DPPH, 2,2-diphenyl-1-picrylhydrazyl; *E*, transpiration rate; EL, electrolyte leakage; Fv/Fm, maximum quantum yield of PSII; GA<sub>3</sub>, gibberellic acid; GB, glycine betaine; GDH, glutamate dehydrogenase; Glu, glutamate; Gly I, glyoxalase I; Gly II, glyoxalase II; GOGAT, glutamate synthase; GPX, glutathione peroxidase; GR, glutathione reductase; *g<sub>s</sub>*, stomatal conductance; GS, glutamine synthetase; GSH, glutathione; GSSG, glutathione disulfide; GST, glutathione S-transferase; GST, glutathione S-transferases; H<sub>2</sub>O<sub>2</sub>, hydrogen peroxide; IAA: indole acetic acid; JA, jasmonic acid; LP, lipid peroxidation; MDA, malondialdehyde; MDHAR, monodehydroascorbate reductase; NADPH, nicotinamide adenine dinucleotide phosphate; NPQ, non-photochemical quenching; NR, nitrate reductase; O<sub>2</sub><sup>-</sup>, superoxide anion; OAT, ornithine aminotransferase; P5C, pyrroline-5-carboxylate; P5CS, pyrroline-5-carboxylate synthase; P<sub>N</sub>, net photosynthetic rate; POX, peroxidase; PPO, polyphenol oxidase; ProDH, proline dehydrogenase; PTS, trisodium-8-hydroxy-1,3,6-pyrenetrisulphonic acid; Put, putrescine; ROS, reactive oxygen species; RuBisCO, ribulose-1,5-bisphosphate carboxylase-oxygenase; RWC, relative water content; SA, salicylic acid; SAMDC, S-adenosylmethionine decarboxylase; SOD, superoxide dismutase; Spd, spermidine; Spm, spermine; TAC, total antioxidant capacity; WUE, water use efficiency; Φ PSII, quantum yield of PSII.
